# Supplementary material for: The Skin-Whitening and Antioxidant Effects of Protocatechuic Acid (PCA) Derivatives in Melanoma and Fibroblast Cell Lines
Source: MDPI journal article supplement (doi:10.3390/cimb45030138), 2023-03-06
Supplement: s1 [file s1]

Supplementary file

# The Skin-Whitening and Antioxidant Effects of Protocatechuic Acid (PCA) Derivatives in Melanoma and Fibroblast Cell Lines

Jaehoon Cho <sup>1,†</sup>, Hyeonbi Jung <sup>2,†</sup>, Dong Young Kang <sup>3,‡</sup>, Nipin Sp <sup>4</sup>, Wooshik Shin <sup>1</sup>, Junhak Lee <sup>5</sup>, Byung Gyu Park <sup>5</sup>, Yoon A Kang <sup>2</sup>, Kyoung-Jin Jang <sup>3,‡,§,\*</sup> and Se Won Bae <sup>2,\*</sup>

<sup>1</sup> Green and Sustainable Materials R&D Department, Korea Institute of Industrial Technology (KITECH), Cheonan 31056, Republic of Korea; cjh0107@kitech.re.kr (J.C.); sws@kitech.re.kr (W.S.)

<sup>2</sup> Department of Chemistry and Cosmetics, Jeju National University, Jeju 63243, Republic of Korea; gusql8309@jejunu.ac.kr (H.J.); kya9887@jejunu.ac.kr (Y.A.K.)

<sup>3</sup> Department of Pathology, School of Medicine, Institute of Biomedical Science and Technology, Konkuk University, Chungju 27478, Republic of Korea; kdy6459@kku.ac.kr

<sup>4</sup> Department of Surgery, Division of Surgical Oncology, The Ohio State University Comprehensive Cancer Center, Columbus, OH 43210, USA; sree04@osumc.edu

<sup>5</sup> R&D Center, ACTIVON Co., Ltd., Cheongju 28104, Republic of Korea; jhlee1708@activon.kr (J.L.); bgpark1503@activon.kr (B.G.P.)

\* Correspondence: jangkj@konkuk.ac.kr (K.-J.J.); swbae@jejunu.ac.kr (S.W.B.)

† These authors contributed equally to this work.

‡ Current address: Department of Immunology, School of Medicine, Konkuk University, 268 Chungwon-daero, Chungju 27478, Republic of Korea.

§ Current address: Institute of Biomedical Science and Technology, Konkuk University, 120 Neungdong-ro, Gwangjin-gu, Seoul 05029, Republic of Korea.

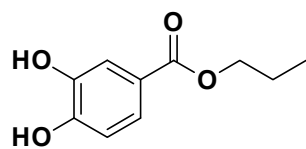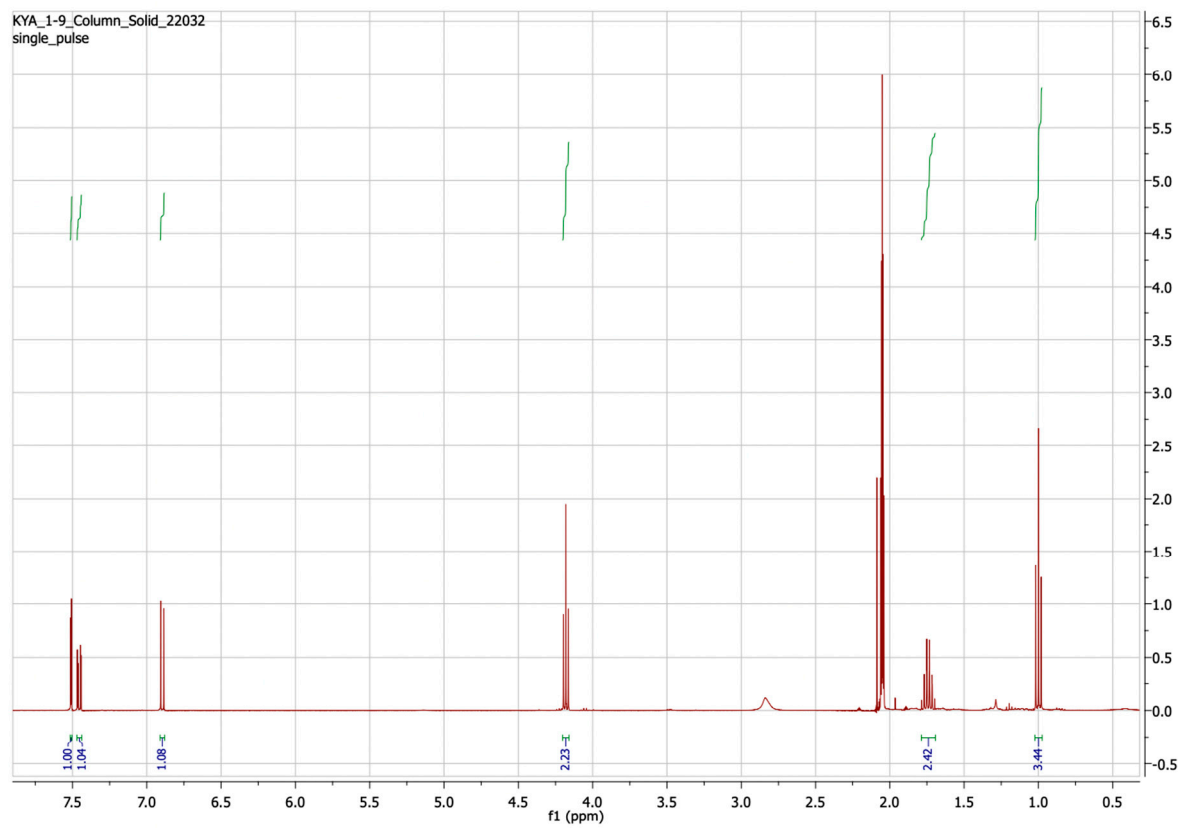

Figure S1. <sup>1</sup>H NMR spectra for PCA-C3

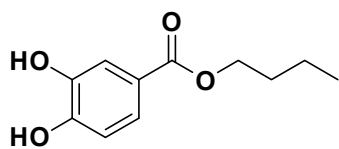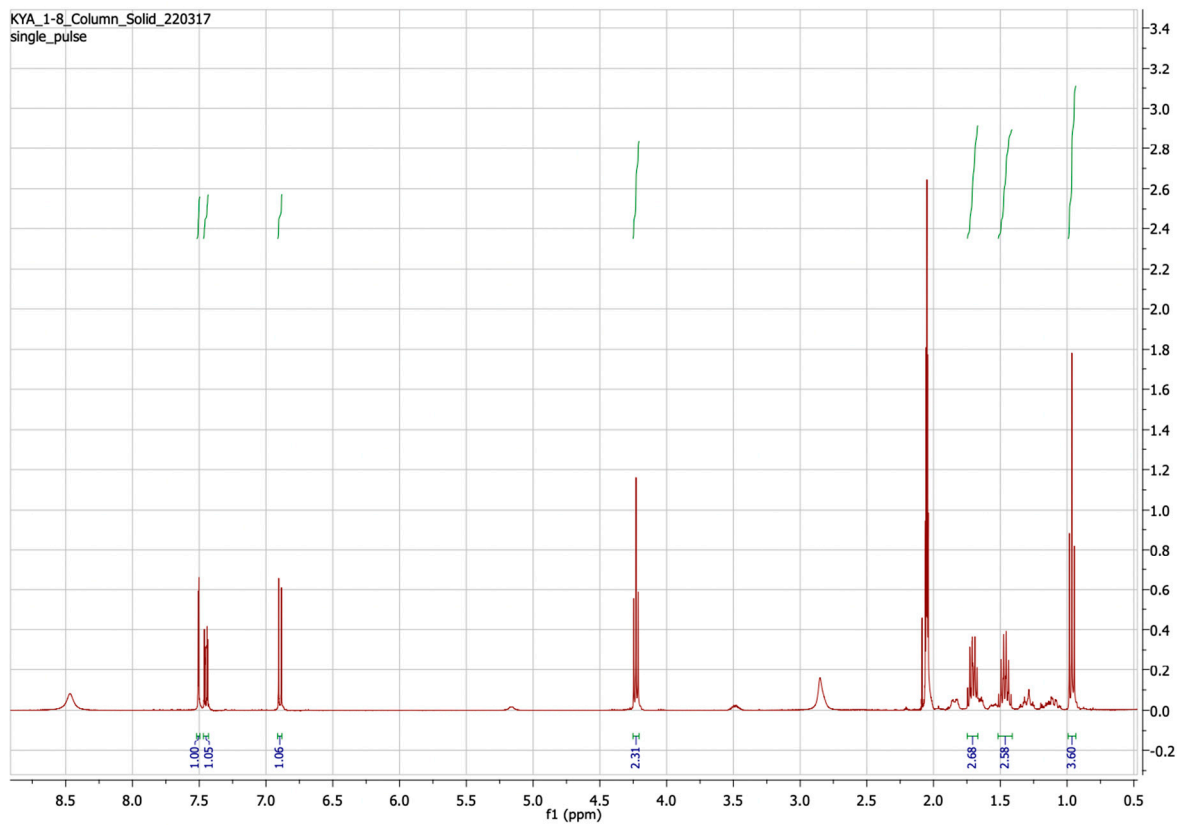

Figure S2. <sup>1</sup>H NMR spectra for PCA-C4

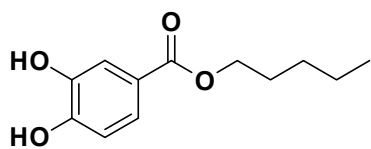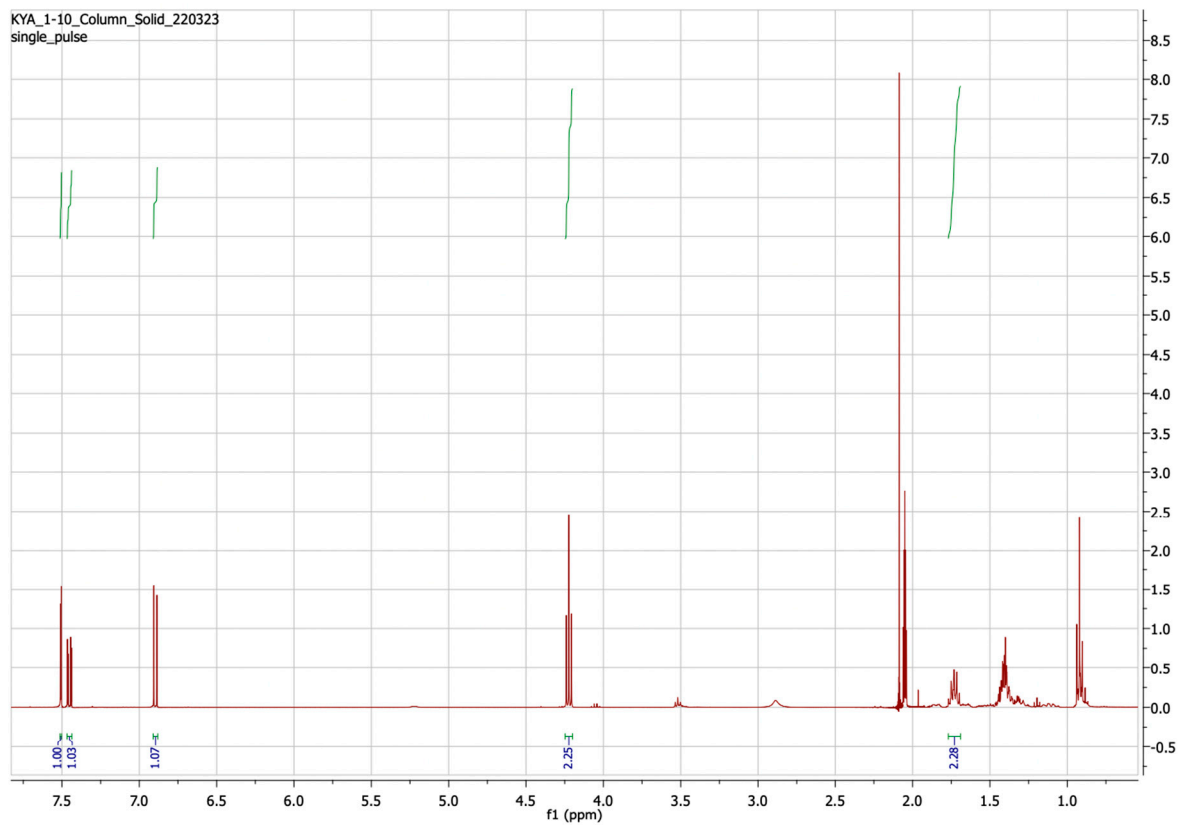

Figure S3.  $^1\text{H}$  NMR spectra for PCA-C5

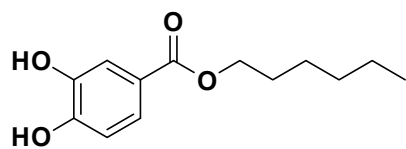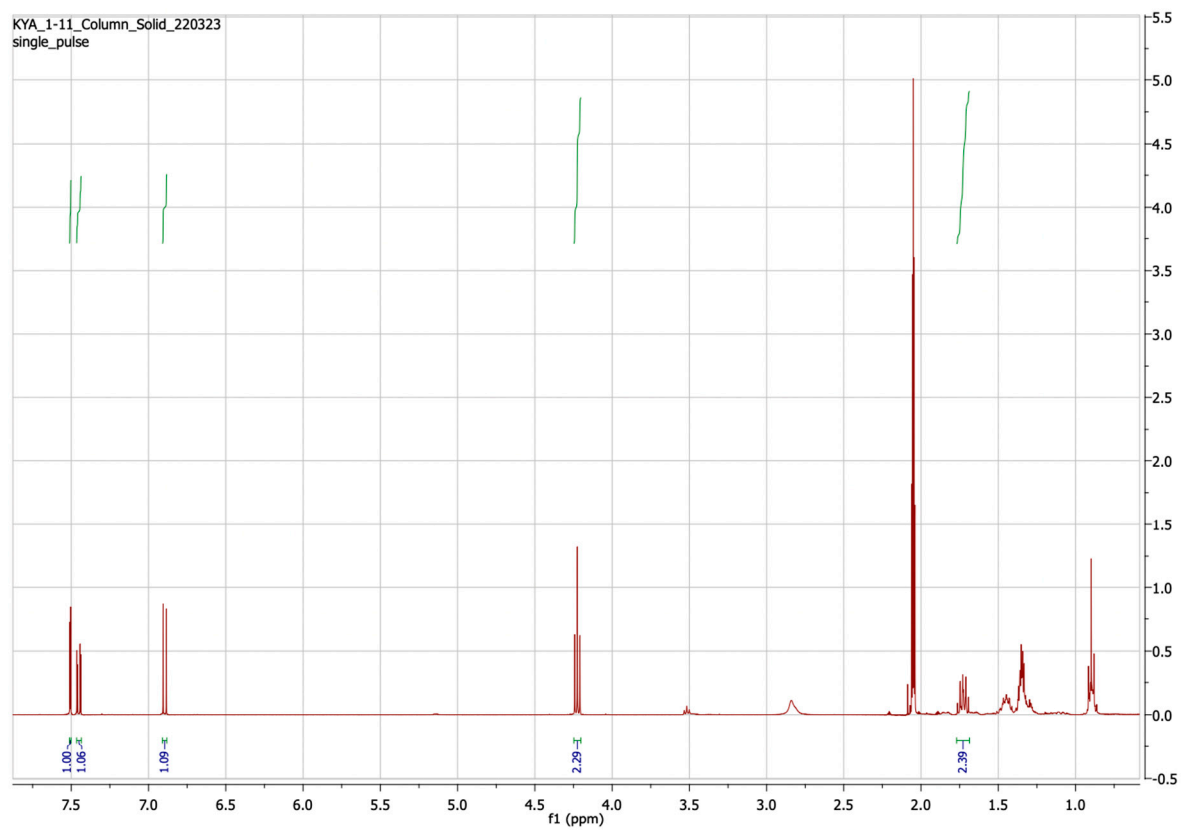

Figure S4.  $^1\text{H}$  NMR spectra for PCA-C6

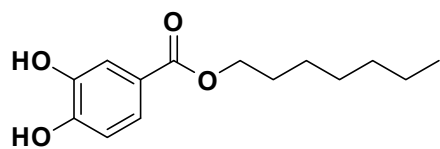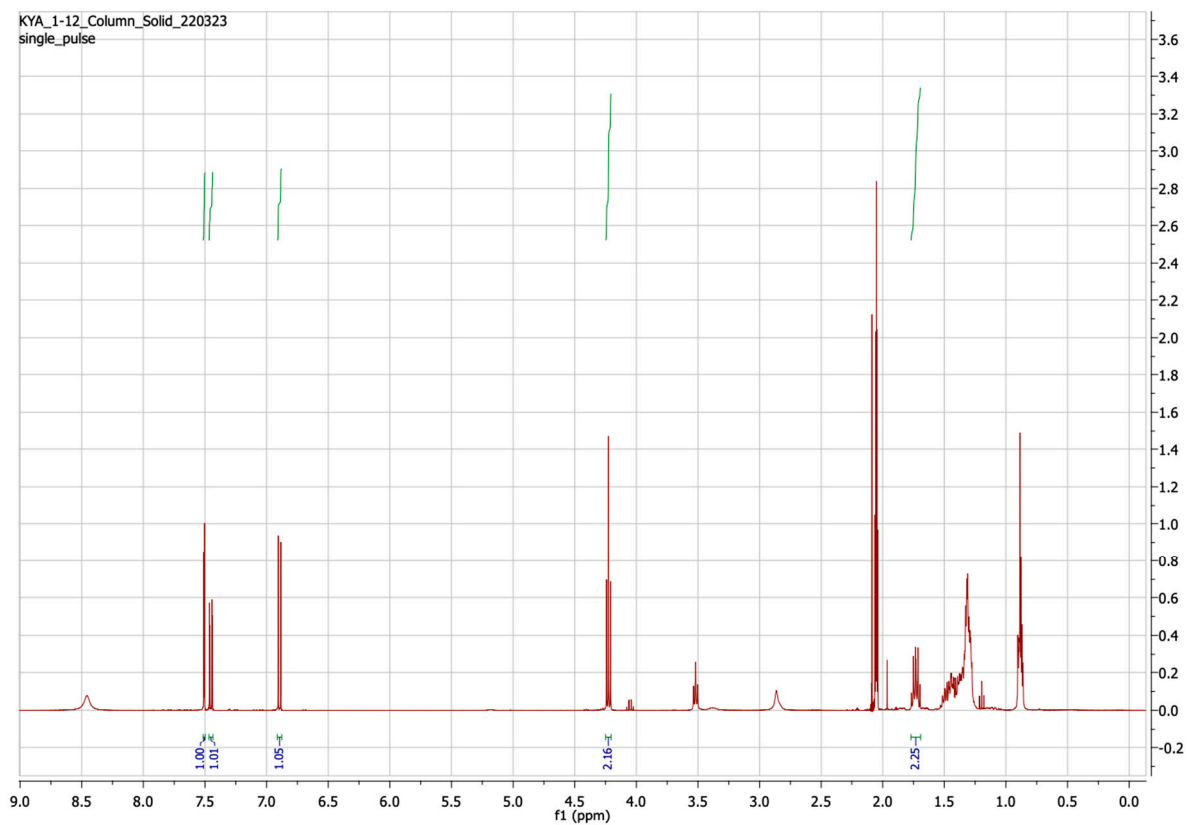

Figure S5. <sup>1</sup>H NMR spectra for PCA-C7

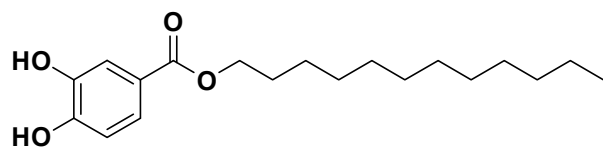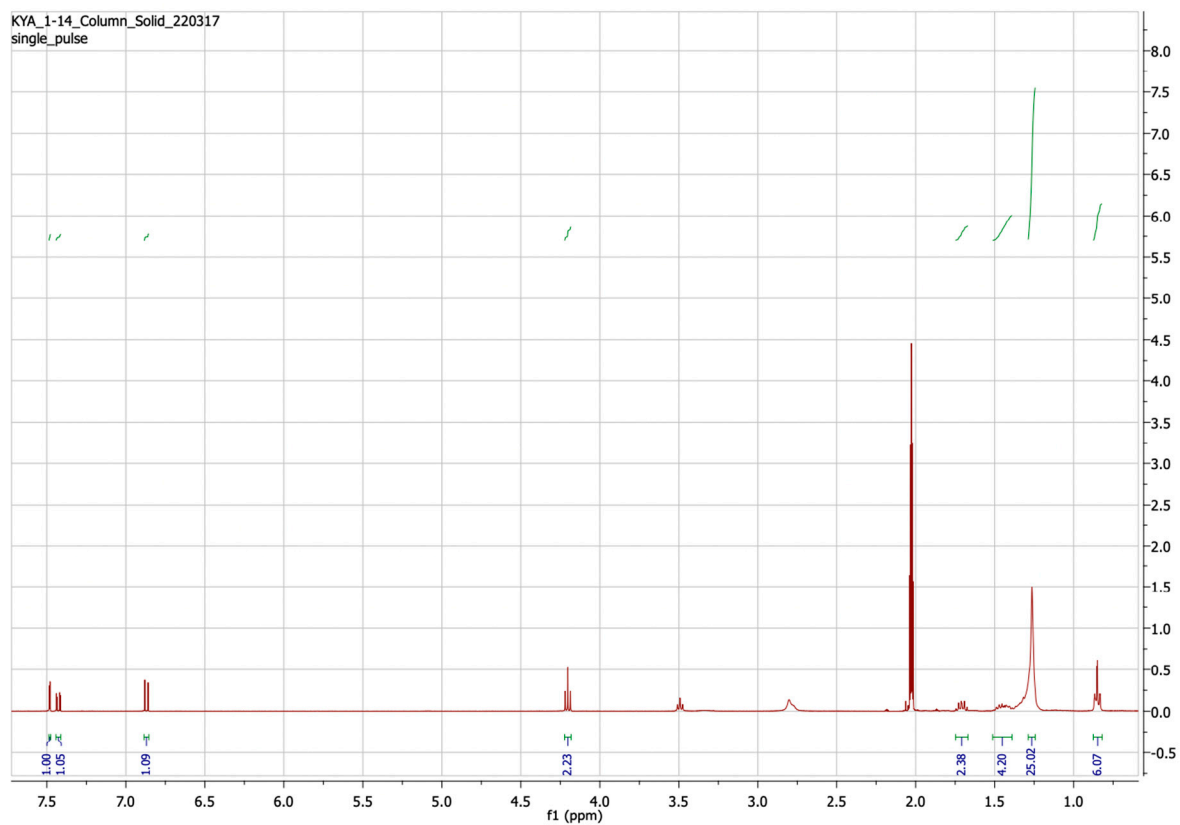

Figure S6. <sup>1</sup>H NMR spectra for PCA-C12

**Table S1.** PCA derivatives reduce  $\alpha$ -MSH-mediated melanin synthesis in B16 melanoma cells.

|                    |            |               | Extracellular Melanin Content |         | Intracellular Melanin Content |         |
|--------------------|------------|---------------|-------------------------------|---------|-------------------------------|---------|
| Compound           |            | Conc. (μg/ml) | Inhibition rate (%)           | P-value | Inhibition rate (%)           | P-value |
| α-MSH (100nM, 72h) | Kojic acid | 100           | 55 ± 2.56                     | 0.0031  | 84 ± 4.37                     | 0.4867  |
|                    | PCA-C0     | 0.25          | ≤ 5                           | 0.0003  | ≤ 5                           | 0.0066  |
|                    |            | 0.5           | ≤ 5                           | 0.0027  | 8 ± 6.55                      | 0.0114  |
|                    |            | 1             | ≤ 5                           | 0.0002  | 30 ± 11.98                    | 0.0308  |
|                    | PCA-C1     | 0.25          | ≤ 5                           | 0.0006  | 39 ± 8.06                     | 0.0429  |
|                    |            | 0.5           | 31 ± 12.11                    | 0.0021  | 35 ± 6.99                     | 0.0347  |
|                    |            | 1             | 40 ± 11.16                    | 0.0031  | 50 ± 1.92                     | 0.0689  |
|                    | PCA-C2     | 0.25          | 19 ± 1.23                     | 0.0003  | ≤ 5                           | 0.0040  |
|                    |            | 0.5           | 16 ± 6.77                     | 0.0004  | 39 ± 13.14                    | 0.0492  |
|                    |            | 1             | 24 ± 2.56                     | 0.0245  | 41 ± 28.75                    | 0.0734  |
|                    | PCA-C3     | 0.25          | ≤ 5                           | 0.0001  | 7 ± 8.68                      | 0.0001  |
|                    |            | 0.5           | 27 ± 5.45                     | 0.0000  | 19 ± 3.92                     | 0.0000  |
|                    |            | 1             | 46 ± 5.03                     | 0.0001  | 61 ± 4.33                     | 0.0006  |
|                    | PCA-C4     | 0.25          | 20 ± 1.15                     | 0.0000  | ≤ 5                           | 0.0000  |
|                    |            | 0.5           | 24 ± 11.13                    | 0.0003  | 12 ± 14.48                    | 0.0006  |
|                    |            | 1             | 50 ± 2.40                     | 0.0000  | 35 ± 7.78                     | 0.0003  |
|                    | PCA-C5     | 0.25          | 32 ± 2.24                     | 0.0000  | 17 ± 19.60                    | 0.2384  |
|                    |            | 0.5           | 67 ± 1.88                     | 0.0000  | 51 ± 9.15                     | 0.0016  |
|                    |            | 1             | 80 ± 0.43                     | 0.0000  | 72 ± 7.76                     | 0.0003  |
|                    | PCA-C6     | 0.25          | 42 ± 5.70                     | 0.0002  | ≤ 5                           | 0.3885  |
|                    |            | 0.5           | 75 ± 1.49                     | 0.0000  | 64 ± 7.42                     | 0.0005  |
|                    |            | 1             | 86 ± 1.14                     | 0.0000  | ≥ 95                          | 0.0001  |
|                    | PCA-C7     | 0.125         | 22 ± 10.03                    | 0.0298  | ≤ 5                           | 0.0044  |
|                    |            | 0.25          | 27 ± 0.76                     | 0.0010  | ≤ 5                           | 0.0021  |
|                    |            | 0.5           | 42 ± 2.86                     | 0.0003  | ≤ 5                           | 0.0007  |
|                    | PCA-C12    | 0.0625        | 9 ± 0.44                      | 0.0456  | 66 ± 48.44                    | 0.0950  |
|                    |            | 0.125         | 25 ± 5.31                     | 0.0042  | ≤ 5                           | 0.0238  |
|                    |            | 0.25          | 53 ± 2.43                     | 0.0001  | ≤ 5                           | 0.1421  |
